# Supplementary material
Source: PubMed Central journal article supplement (PMC2630271)
Supplement: blood-2007-12-124818_1.pdf [file blood-2007-12-124818_1.pdf]

|                            |                       | No. | %   |
|----------------------------|-----------------------|-----|-----|
| Evaluable                  | Yes                   | 94  | 54% |
| Cytogenetics?              | No                    | 81  | 46% |
| Normal                     | Yes                   | 52  | 55% |
| Karyotype? <sup>1</sup>    | No                    | 42  | 54% |
| Cytogenetic                | Favorable             | 8   | 9%  |
| Risk                       | Intermediate          | 64  | 68% |
| Category <sup>1</sup>      | Unfavorable           | 20  | 21% |
|                            | Unknown               | 2   | 2%  |
| Specific                   | -5 / 5q-              | 3   | 3%  |
| Abnormalities <sup>1</sup> | -7 / 7q-              | 2   | 2%  |
|                            | +8                    | 6   | 6%  |
|                            | abn(11q)              | 7   | 7%  |
|                            | abn(13q)              | 1   | 1%  |
|                            | iso(17q)              | 2   | 2%  |
|                            | abn(17p)              | 1   | 1%  |
|                            | abn(20q)              | 2   | 2%  |
|                            | abn(21q), not t(8;21) | 0   | 0%  |
|                            | t(9;22)               | 2   | 2%  |
|                            | t(8;21)               | 3   | 3%  |
|                            | inv(16)               | 6   | 6%  |
|                            | inv(3)                | 0   | 0%  |
|                            | -X                    | 3   | 3%  |
|                            | -Y <sup>2</sup>       | 3   | 6%  |
|                            | Other trisomy         | 7   | 7%  |
|                            | Other abnormality     | 19  | 20% |
|                            | Complex               | 3   | 3%  |

<sup>1</sup> Percentages based on N=94 with evaluable cytogenetic studies.

<sup>2</sup> Percentage based on N=49 males with evaluable cytogenetic studies.
