# Supplementary material
Source: PubMed Central journal article supplement (PMC2630271)
Supplement: blood-2007-12-124818_2.pdf [file blood-2007-12-124818_2.pdf]

|                         |        | No. | %   |
|-------------------------|--------|-----|-----|
| FLT3 ITD status         | Yes    | 77  | 44% |
| known?                  | No     | 98  | 56% |
| FLT3 ITDs               | Yes    | 25  | 32% |
| present? <sup>1</sup>   | No     | 52  | 68% |
| ITD length <sup>1</sup> | 0      | 52  | 68% |
|                         | 1 – 39 | 12  | 16% |
|                         | 40+    | 13  | 17% |

<sup>1</sup> Percentages based on N=77 with known FLT3 ITD status.
