# Supplementary material
Source: PubMed Central journal article supplement (PMC2630271)
Supplement: blood-2007-12-124818_4.pdf [file blood-2007-12-124818_4.pdf]

|                               |        | Included Patients<br>(N = 175) |            | Excluded Patients<br>(N = 1240) |            |
|-------------------------------|--------|--------------------------------|------------|---------------------------------|------------|
|                               |        | No.                            | %          | No.                             | %          |
| Response                      | CR     | 84                             | 48%        | 621                             | 50%        |
|                               | Not CR | 91                             | 52%        | 619                             | 50%        |
|                               |        | Median                         | 95% CI     | Median                          | 95% CI     |
| Median overall survival (mos) |        | 10.7                           | 9.1 – 12.3 | 10.8                            | 9.6 – 11.9 |
| 5-year survival probability   |        | 17%                            | 11 – 22%   | 15%                             | 13 – 17%   |
