# Supplementary material
Source: PubMed Central journal article supplement (PMC2630271)
Supplement: blood-2007-12-124818_5.pdf [file blood-2007-12-124818_5.pdf]

|                        | Patients without fibronectin-adherent cell data |        |              | Patients with fibronectin-adherent cell data |        |              | P-value <sup>1</sup> |
|------------------------|-------------------------------------------------|--------|--------------|----------------------------------------------|--------|--------------|----------------------|
|                        | Pts                                             | Median | Range        | Pts                                          | Median | Range        |                      |
| $\alpha_4$ % expr.     | 155                                             | 70.4%  | 5.4 – 99.7%  | 20                                           | 48.1%  | 6.7 – 93.7%  | 0.32                 |
| $\alpha_4$ MFI         | 155                                             | 43.3   | 12.2 – 999.1 | 20                                           | 46.2   | 12.2 – 375.7 | 0.79                 |
| $\alpha_4$ comb. expr. | 155                                             | 26.8   | 2.1 – 469.8  | 20                                           | 16.9   | 2.0 – 117.7  | 0.63                 |
| $\beta_1$ %expression  | 155                                             | 35.4%  | 0.2 – 99.2%  | 20                                           | 22.1%  | 7.4 – 80.4%  | 0.081                |
| $\beta_1$ MFI          | 155                                             | 31.6   | 5.9 – 333.3  | 20                                           | 25.0   | 6.0 – 539.7  | 0.82                 |
| $\beta_1$ comb. expr.  | 155                                             | 12.2   | 0.2 – 219.3  | 20                                           | 9.3    | 1.5 – 130.9  | 0.47                 |
| CD34 % expr.           | 155                                             | 7.1%   | 0.2 – 18.4%  | 20                                           | 2.7%   | 0.2 – 90.4%  | 0.079                |
| CD34 MFI               | 155                                             | 33.2   | 7.2 – 90.2   | 20                                           | 28.2   | 11.1 – 94.7  | 0.21                 |
| CD34 comb. expr.       | 155                                             | 2.7    | 0.1 – 63.2   | 20                                           | 6.9    | 0.1 – 85.6   | 0.20                 |
| CD117 % expr.          | 155                                             | 1.4%   | 0.0 – 63.0%  | 20                                           | 0.8%   | 0.1 – 5.4%   | 0.15                 |
| CD117 MFI              | 155                                             | 9.0    | 0.0 – 86.7   | 20                                           | 9.4    | 4.2 – 33.3   | 0.25                 |
| CD117 comb. expr.      | 155                                             | 0.1    | 0.00 – 6.6   | 20                                           | 0.1    | 0.0 – 0.7    | 0.43                 |
| sVCAM-1 % expr.        | 93                                              | 20.4%  | 2.0 – 96.8%  | 9                                            | 34.7   | 2.6 – 72.3   | 0.76                 |
| sVCAM-1 MFI            | 93                                              | 52.0   | 10.4 – 520.1 | 9                                            | 63.3   | 20.9 – 250.1 | 0.48                 |
| sVCAM-1 comb. expr.    | 93                                              | 11.6   | 0.3 – 290.2  | 9                                            | 15.3   | 0.8 – 64.2   | 0.60                 |
