# Supplementary material
Source: PubMed Central journal article supplement (PMC2630271)
Supplement: blood-2007-12-124818_6.pdf [file blood-2007-12-124818_6.pdf]

|                        | Patients without $\beta_1$<br>activation data |        |              | Patients with $\beta_1$<br>activation data |        |              | P-value <sup>1</sup> |
|------------------------|-----------------------------------------------|--------|--------------|--------------------------------------------|--------|--------------|----------------------|
|                        | Pts                                           | Median | Range        | Pts                                        | Median | Range        |                      |
| $\alpha_4$ % expr.     | 151                                           | 70.5%  | 5.4 – 99.7%  | 24                                         | 40.6%  | 6.2 – 97.8%  | 0.12                 |
| $\alpha_4$ MFI         | 151                                           | 41.0   | 12.2 – 999.1 | 24                                         | 85.9   | 17.0 – 496.0 | 0.0002               |
| $\alpha_4$ comb. expr. | 151                                           | 23.6   | 2.0 – 326.6  | 24                                         | 35.4   | 3.6 – 469.8  | 0.068                |
| $\beta_1$ %expression  | 151                                           | 34.7%  | 0.2 – 99.2%  | 24                                         | 35.1%  | 9.8 – 89.0%  | 0.93                 |
| $\beta_1$ MFI          | 151                                           | 28.0   | 5.9 – 539.7  | 24                                         | 77.5   | 11.0 – 376.7 | 0.0002               |
| $\beta_1$ comb. expr.  | 151                                           | 10.3   | 0.2 – 219.3  | 24                                         | 23.6   | 2.8 – 151.8  | 0.0016               |
| CD34 % expr.           | 151                                           | 10.0%  | 0.2 – 90.4%  | 24                                         | 4.1%   | 0.2 – 65.3%  | 0.16                 |
| CD34 MFI               | 151                                           | 32.9   | 11.1 – 94.7  | 24                                         | 34.8   | 7.2 – 66.5   | 0.34                 |
| CD34 comb. expr.       | 151                                           | 2.8    | 0.1 – 85.6   | 24                                         | 1.4    | 0.1 – 24.4   | 0.21                 |
| CD117 % expr.          | 151                                           | 1.3%   | 0.0 – 63.0%  | 24                                         | 1.6%   | 0.1 – 7.9%   | 0.71                 |
| CD117 MFI              | 151                                           | 9.0    | 0.0 – 86.7   | 24                                         | 8.5    | 3.1 – 60.8   | 0.64                 |
| CD117 comb. expr.      | 151                                           | 0.1    | 0.00 – 6.6   | 24                                         | 0.1    | 0.0 – 0.6    | 0.96                 |
| sVCAM-1 % expr.        | 78                                            | 17.4%  | 2.0 – 96.8%  | 24                                         | 32.3   | 2.7 – 71.9   | 0.098                |
| sVCAM-1 MFI            | 78                                            | 50.0   | 10.4 – 520.1 | 24                                         | 58.0   | 20.9 – 498.4 | 0.40                 |
| sVCAM-1 comb. expr.    | 78                                            | 11.7   | 0.3 – 290.2  | 24                                         | 18.9   | 1.3 – 139.2  | 0.12                 |

<sup>1</sup> Two-tailed p-value based on Wilcoxon rank sum test.
